# Supplementary material for: The tryptophan metabolic pathway of the microbiome and host cells in health and disease
Source: PubMed Central journal article supplement — Int Immunol. 2024 Jun 13;36(12):601–16. doi: 10.1093/intimm/dxae035 (PMC11562643; doi:10.1093/intimm/dxae035), 2024-06-13
Supplement: dxae035_suppl_supplementary_figure_s1.pdf [file dxae035_suppl_supplementary_figure_s1.pdf]

# Tryptophan metabolism (KEGG pathway)

■ Human genome hit  
■ Bacteria genome hits  
 AnnoTree version 2.0.0

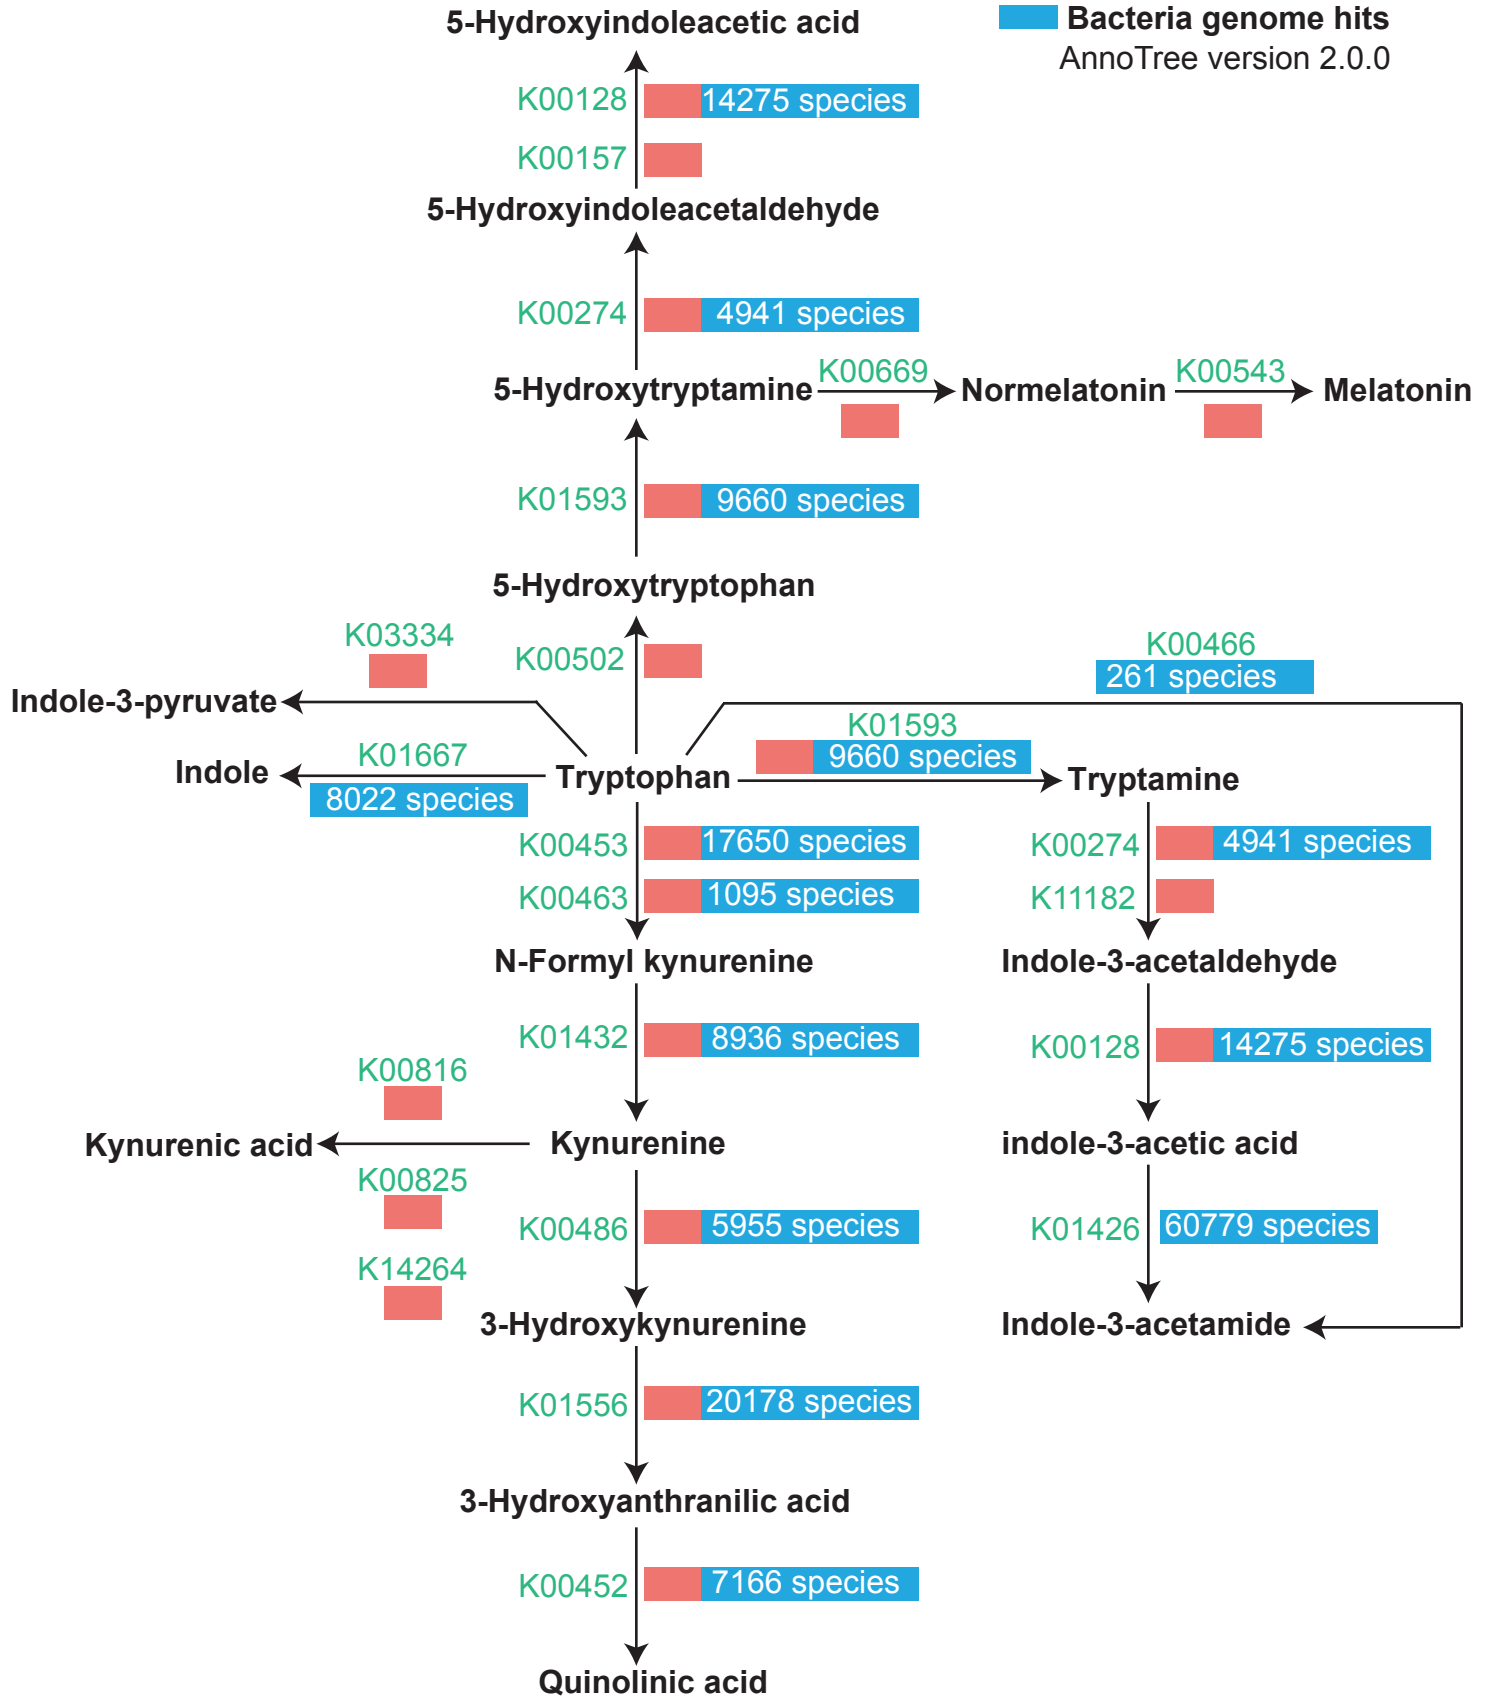

Overview of human and bacterial tryptophan metabolism pathway using the Kyoto Encyclopedia of Genes and Genomes (KEGG) pathway and AnnoTree
